# Supplementary material for: Platelet-albumin-bilirubin score and neutrophil-to-lymphocyte ratio predict intensive care unit admission in patients with end-stage kidney disease infected with the Omicron variant of COVID-19: a single-center prospective cohort study
Source: PubMed Central journal article supplement — Ren Fail. 2023 Apr 12;45(1):2199097. doi: 10.1080/0886022X.2023.2199097 (PMC10114985; doi:10.1080/0886022x.2023.2199097), 2023-04-12
Supplement: IRNF_A_2199097_SM9487.pdf [file IRNF_A_2199097_SM9487.pdf]

**Supplemental Table 1 Calculation of the DIC score**

| Points                                    | 0          | 1         | 2       | 3    |
|-------------------------------------------|------------|-----------|---------|------|
| Platelet count, $\times 10^3/\mu\text{L}$ | >100       | $\geq 50$ | < 50    |      |
| D-dimer, $\mu\text{g/ml}$                 | $\leq 1.0$ |           | 1.0-5.0 | >5.0 |
| Fibrinogen, $\text{g/L}$                  | >10        | $\leq 10$ |         |      |
| PT prolong,s                              | <3         | 3.0-6.0   | >6      |      |
